# Supplementary material for: Single-Source Vapor-Deposited Cs2AgBiBr6 Thin Films for Lead-Free Perovskite Solar Cells
Source: PubMed Central journal article supplement (PMC6956276; doi:10.3390/nano9121760), 2019-12-11
Supplement: nanomaterials-09-01760-s001.pdf [file nanomaterials-09-01760-s001.pdf]

# Supporting Information

## Single-Source Vapor-Deposited Cs<sub>2</sub>AgBiBr<sub>6</sub> Thin Films for Lead-Free Perovskite Solar Cells

Ping Fan, Huan-Xin Peng, Zhuang-Hao Zheng, Zi-Hang Chen, Shi-Jie Tan, Xing-Ye Chen, Yan-Di Luo, Zheng-Hua Su, Jing-Ting Luo, and Guang-Xing Liang \*

Shenzhen Key Laboratory of Advanced Thin Films and Applications, College of Physics and Optoelectronic Engineering, Shenzhen University, Shenzhen 518060, China; fanping@szu.edu.cn (P.F.); P2385284535@163.com (H.-X.P.); zhengzh@szu.edu.cn (Z.-H.Z.); chen798491170@126.com (Z.-H.C.); 2017171042@email.szu.edu.cn (S.-J.T.); ymt\_0198@163.com (X.-Y.C.); lyandidi@163.com (Y.-D.L.); zhsu@szu.edu.cn (Z.-H.S.); luojt@szu.edu.cn (J.-T.L.)

\* Correspondence: lgx@szu.edu.cn

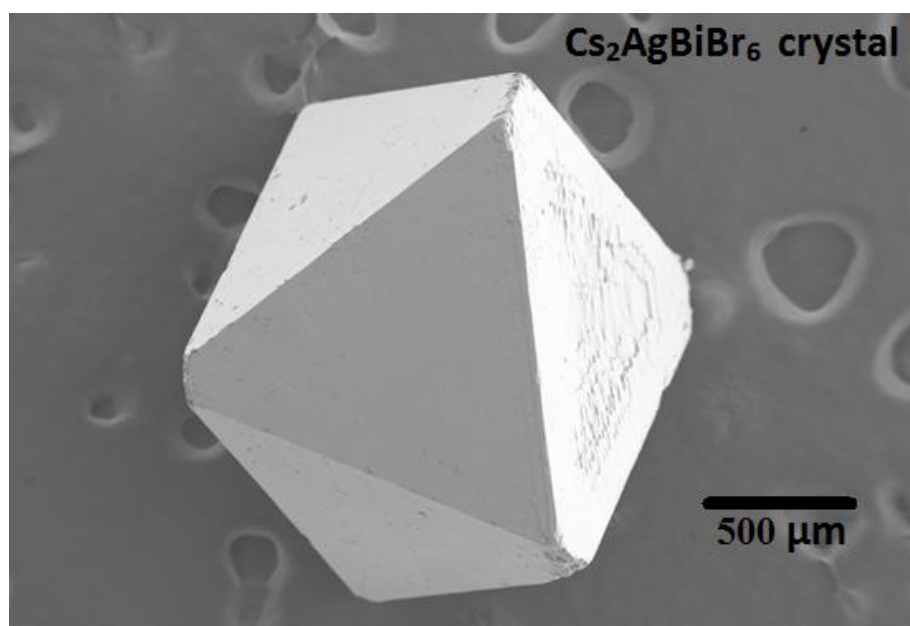

**Fig. S1.** SEM image of Cs<sub>2</sub>AgBiBr<sub>6</sub> crystal with typical octahedral morphology.

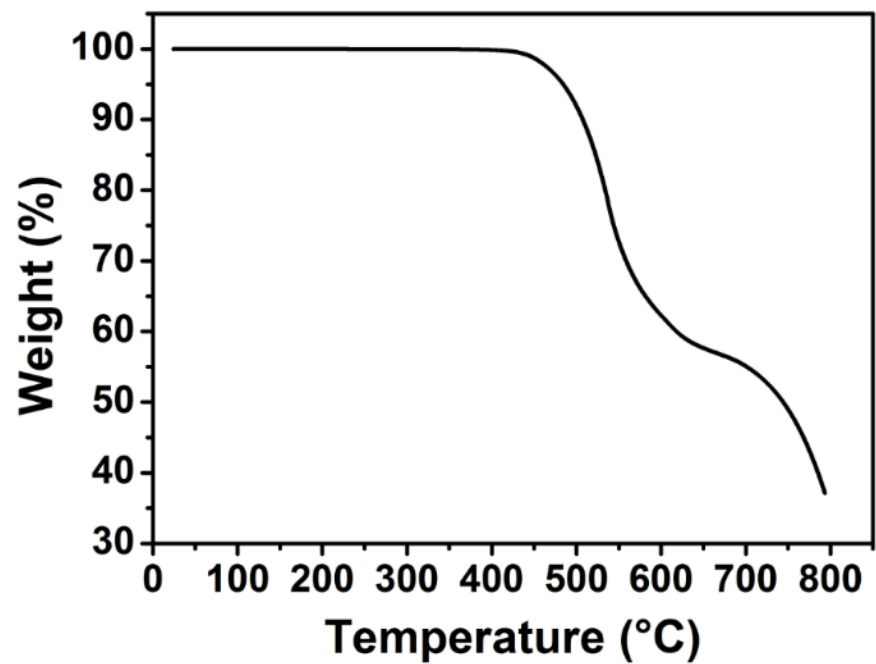

Fig. S2. Thermogravimetric analysis of Cs<sub>2</sub>AgBiBr<sub>6</sub> powder.

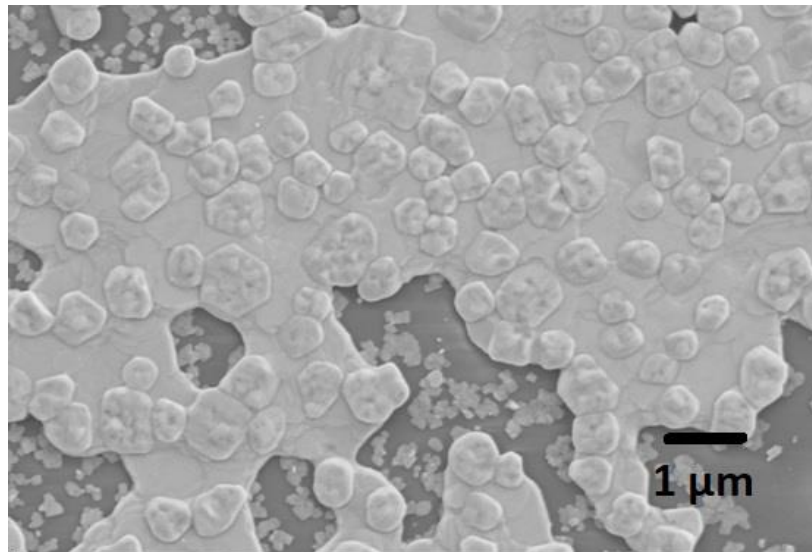

Fig. S3. SEM surface morphology of Cs<sub>2</sub>AgBiBr<sub>6</sub> film thermally annealed at 350 °C for 30 min.

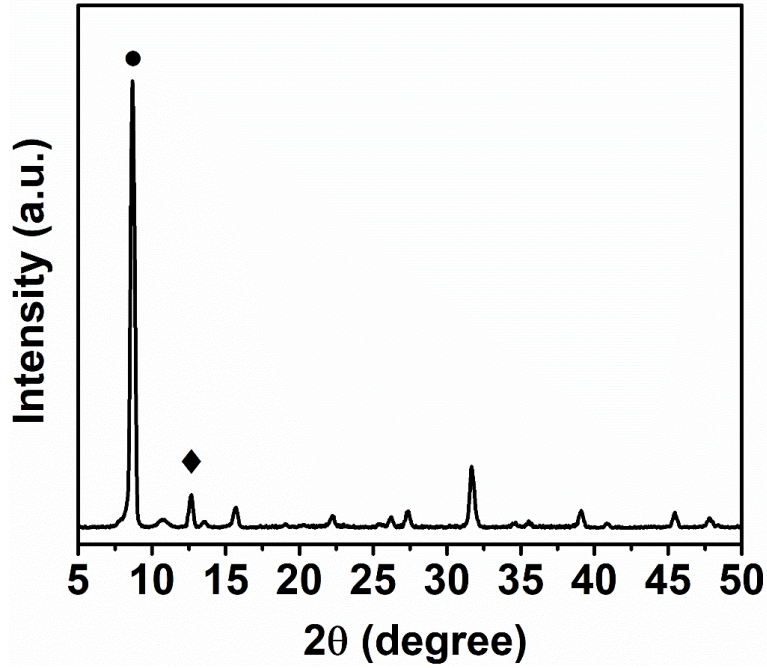

Fig. S4. XRD pattern of  $\text{Cs}_2\text{AgBiBr}_6$  film thermally annealed at  $350\text{ }^\circ\text{C}$  for 30 min. The positions of reflections labeled by circle (●) and diamond (◆) indicate the additional phases of  $\text{CsAgBr}_2$  and  $\text{Cs}_3\text{Bi}_2\text{Br}_9$  respectively.

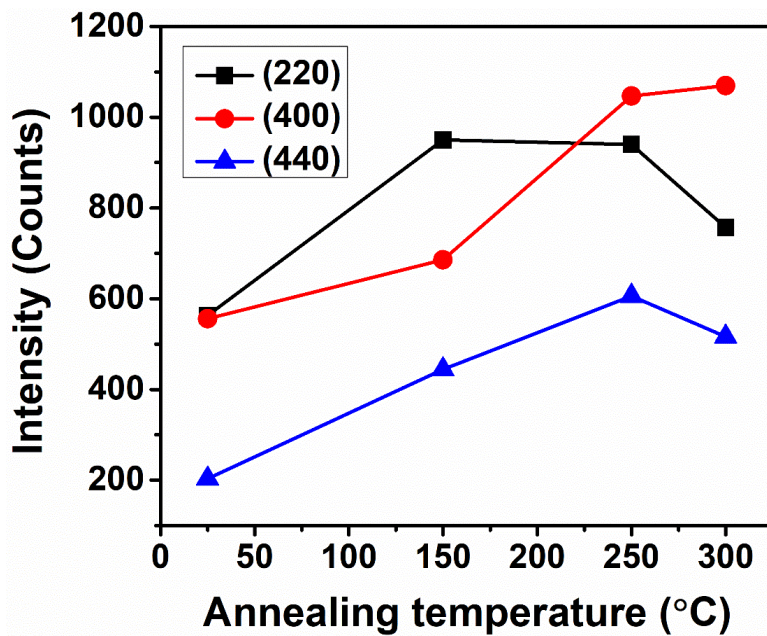

Fig. S5. The diffraction peak intensity of (220), (400) and (440) planes of  $\text{Cs}_2\text{AgBiBr}_6$  films as a function of annealing temperature, respectively.

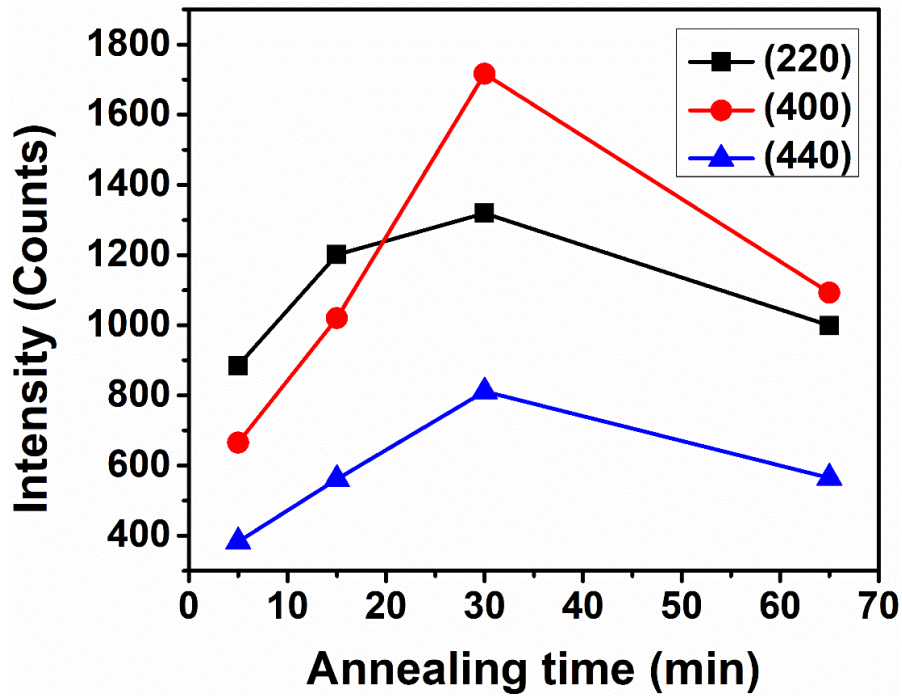

Fig. S6. The diffraction peak intensity of (220), (400) and (440) planes of  $\text{Cs}_2\text{AgBiBr}_6$  films as a function of annealing time, respectively.

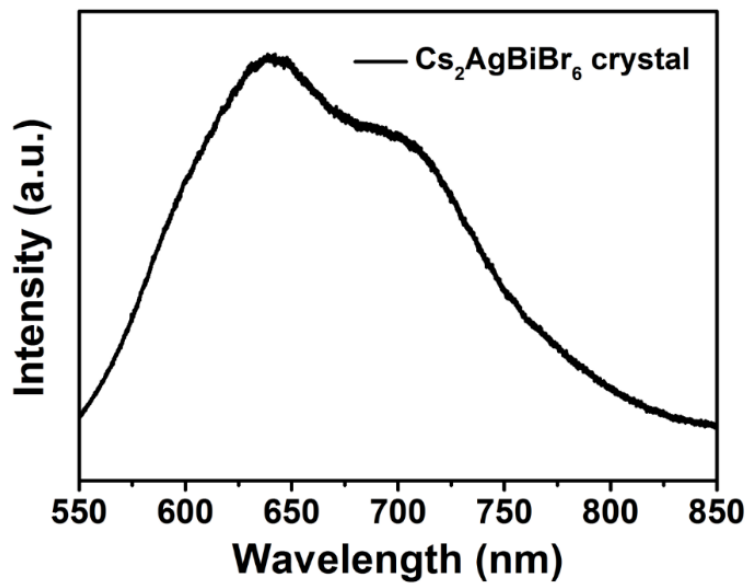

Fig. S7. Steady-state photoluminescence spectrum of  $\text{Cs}_2\text{AgBiBr}_6$  crystal.

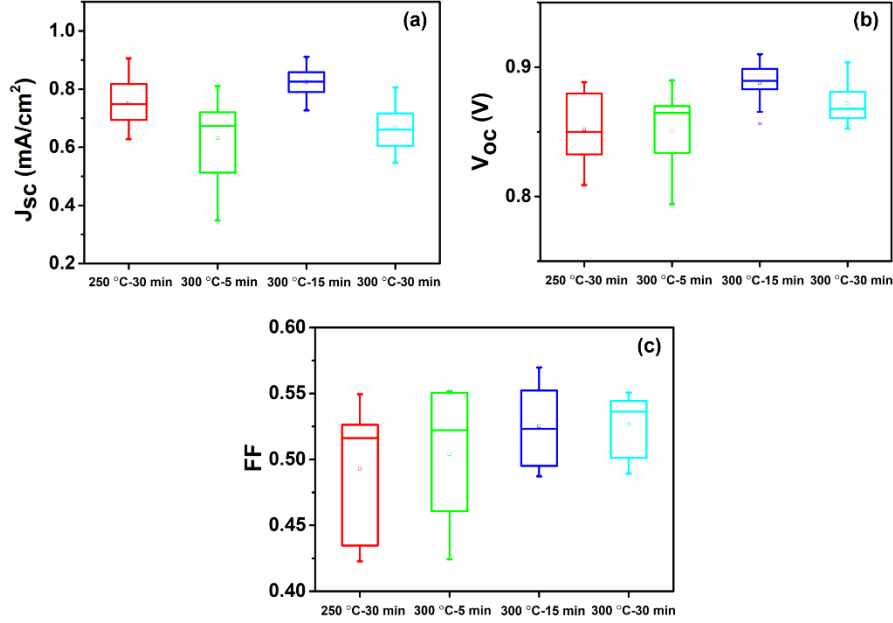

**Fig. S8.** The statistical box charts of open-circuit voltage ( $V_{oc}$ ), short-circuit current density ( $J_{sc}$ ) and fill factor (FF) of solar cells assembled with  $Cs_2AgBiBr_6$  films (297 nm) annealed at 250 °C and 300 °C for different times respectively. The values were obtained from 16 individual devices per annealing condition.

**Table S1.** Device performance of  $Cs_2AgBiBr_6$  films with different annealing time and temperatures.

| Sample                           | $J_{sc}$ (mA/cm <sup>2</sup> ) | $V_{oc}$ (V)    | FF              | PCE (%)         |
|----------------------------------|--------------------------------|-----------------|-----------------|-----------------|
| $Cs_2AgBiBr_6$<br>(250 °C-30min) | $0.75 \pm 0.09$                | $0.85 \pm 0.03$ | $0.60 \pm 0.06$ | $0.25 \pm 0.06$ |
| $Cs_2AgBiBr_6$<br>(300 °C-5min)  | $0.63 \pm 0.15$                | $0.85 \pm 0.03$ | $0.61 \pm 0.05$ | $0.17 \pm 0.07$ |
| $Cs_2AgBiBr_6$<br>(300 °C-15min) | $0.82 \pm 0.05$                | $0.89 \pm 0.01$ | $0.53 \pm 0.03$ | $0.40 \pm 0.03$ |
| $Cs_2AgBiBr_6$<br>(300 °C-30min) | $0.67 \pm 0.08$                | $0.87 \pm 0.02$ | $0.53 \pm 0.03$ | $0.31 \pm 0.05$ |

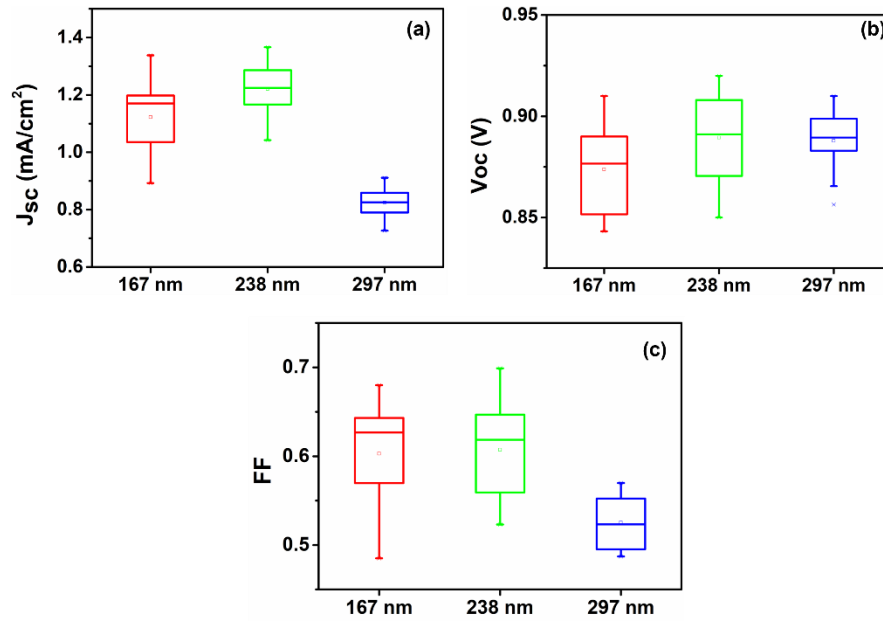

**Fig. S9.** The statistical box charts of open-circuit voltage ( $V_{oc}$ ), short-circuit current density ( $J_{sc}$ ) and fill factor ( $FF$ ) of solar cells based on  $\text{Cs}_2\text{AgBiBr}_6$  films with various thin film thickness. The values were obtained from 16 individual devices per annealing condition.

**Table S2.** Parameters of solar cell devices with different  $\text{Cs}_2\text{AgBiBr}_6$  film thicknesses.

| Sample                                   | $J_{sc}$ ( $\text{mA}/\text{cm}^2$ ) | $V_{oc}$ (V)    | FF              | PCE (%)         |
|------------------------------------------|--------------------------------------|-----------------|-----------------|-----------------|
| $\text{Cs}_2\text{AgBiBr}_6$<br>(167 nm) | $1.12 \pm 0.12$                      | $0.87 \pm 0.02$ | $0.60 \pm 0.06$ | $0.53 \pm 0.10$ |
| $\text{Cs}_2\text{AgBiBr}_6$<br>(238 nm) | $1.22 \pm 0.08$                      | $0.89 \pm 0.02$ | $0.61 \pm 0.05$ | $0.60 \pm 0.05$ |
| $\text{Cs}_2\text{AgBiBr}_6$<br>(297 nm) | $0.82 \pm 0.05$                      | $0.89 \pm 0.01$ | $0.53 \pm 0.03$ | $0.40 \pm 0.03$ |

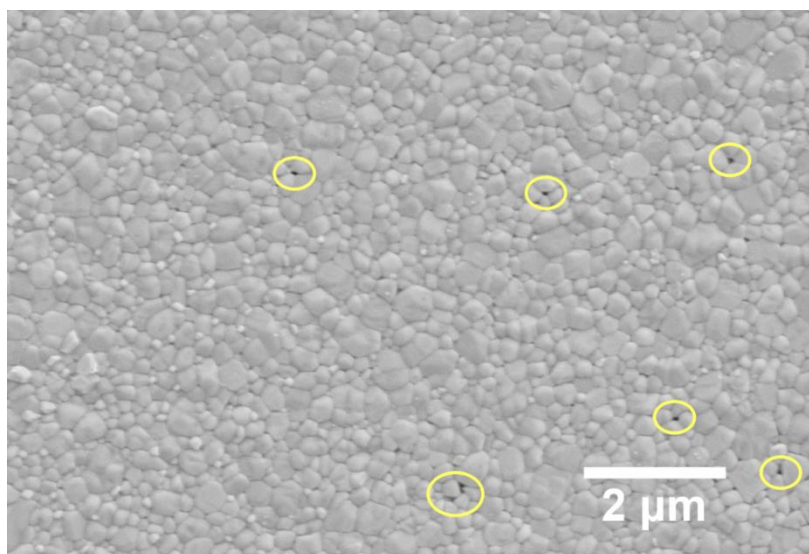

**Fig. S10.** SEM surface morphology of Cs<sub>2</sub>AgBiBr<sub>6</sub> film annealed at 300 °C for 15 min. The film thickness is approximately 167 nm. The areas marked by yellow circles indicate pinholes in the Cs<sub>2</sub>AgBiBr<sub>6</sub> film.

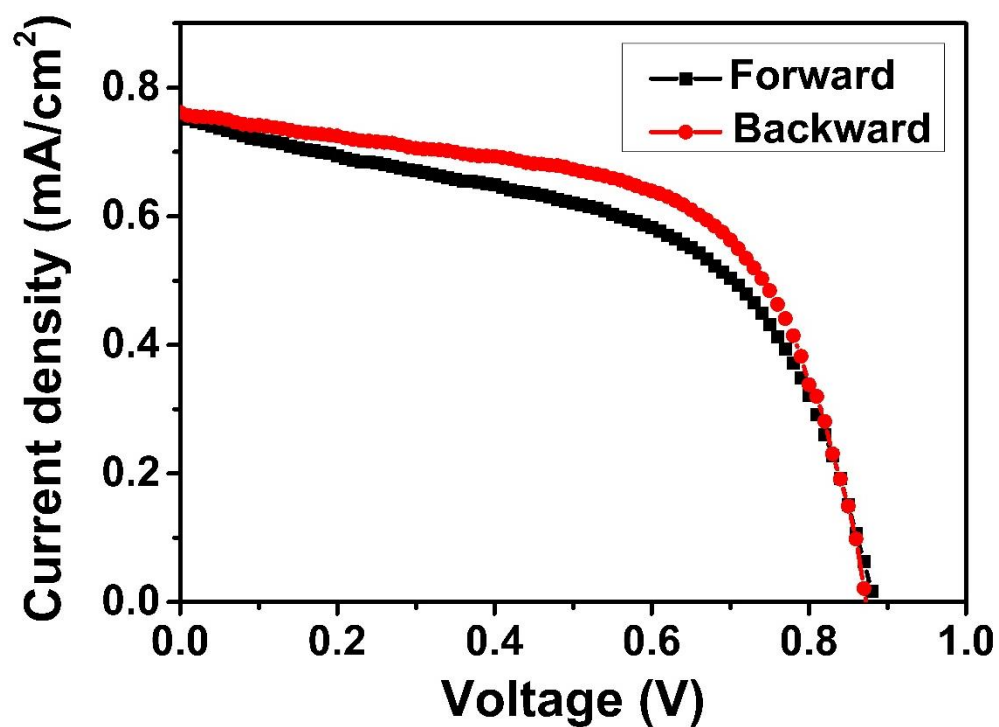

**Fig. S11.** J-V curves of Cs<sub>2</sub>AgBiBr<sub>6</sub> solar cell, measured by backward scan and forward scan. The Cs<sub>2</sub>AgBiBr<sub>6</sub> film was prepared at 300 °C for 30 min.
